# Supplementary material
Source: PubMed Central journal article supplement (PMC2756009)

**Figure S1**

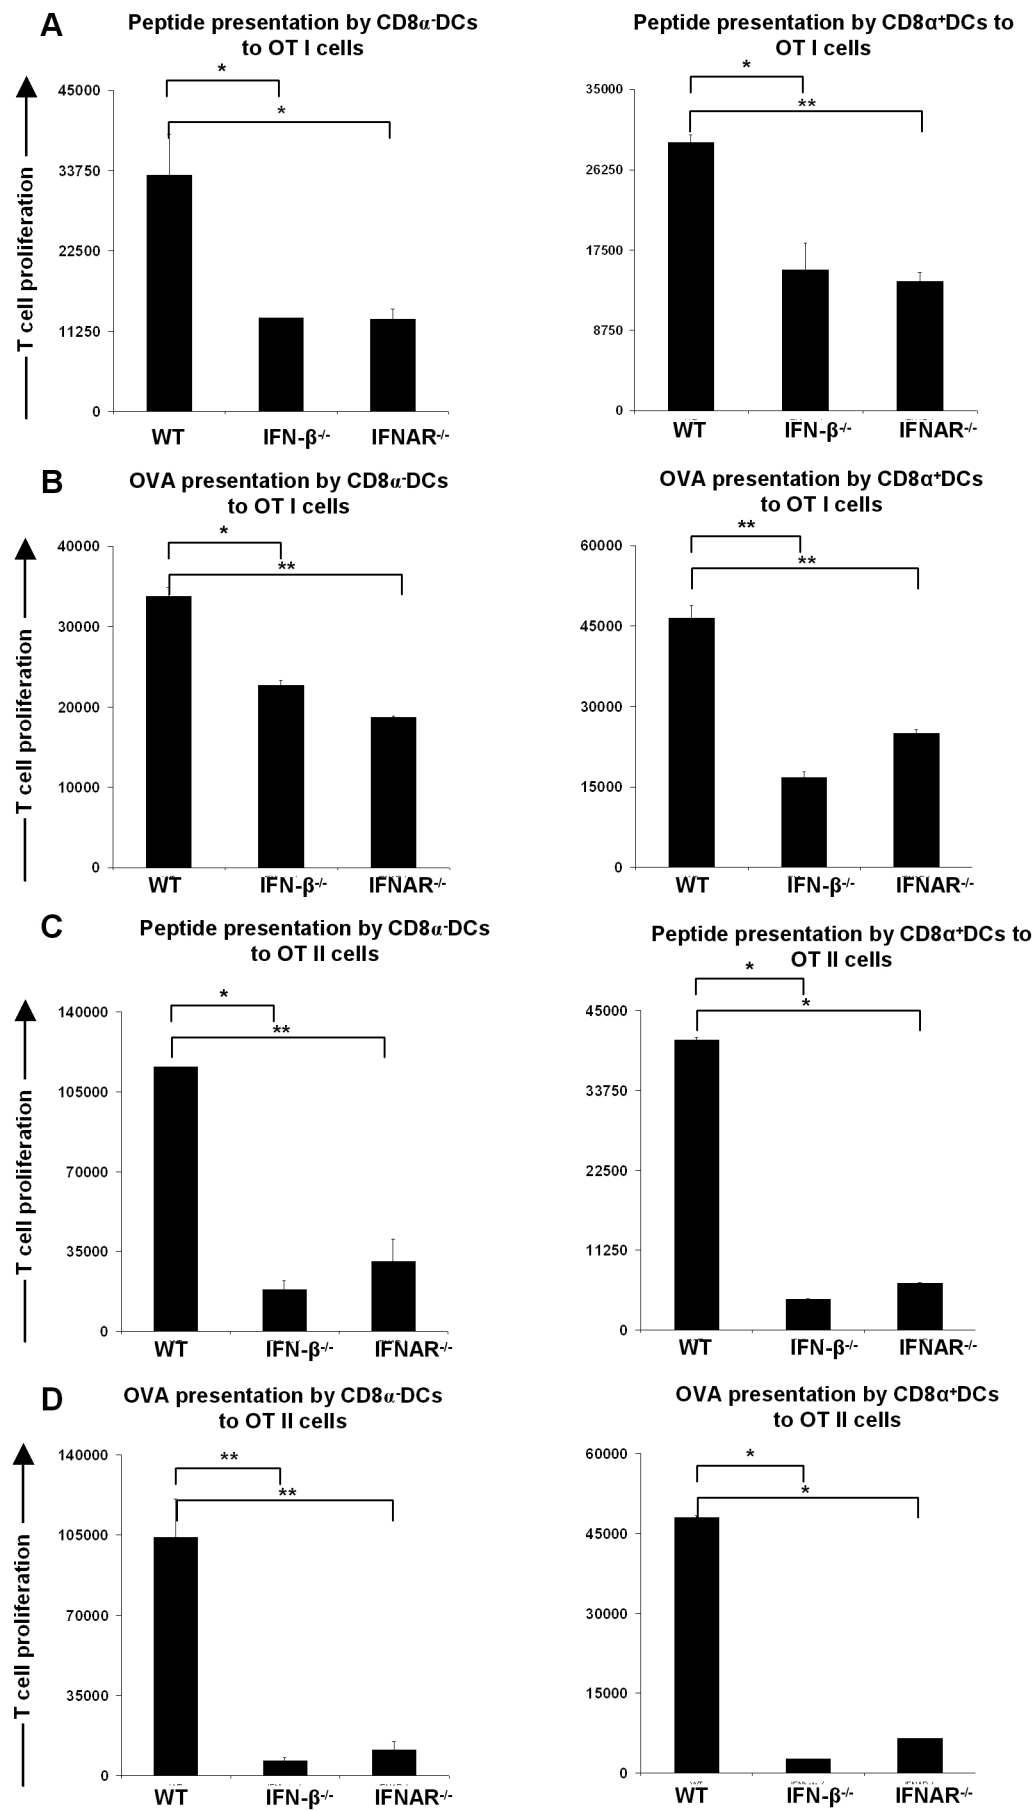

Supplement: NIHMS119797-supplement-Figure_S1.pdf [file NIHMS119797-supplement-Figure_S1.pdf]

Figure S2

**A**

OT I assay CD8 $\alpha$ -DCs

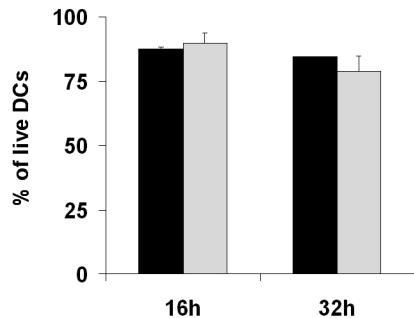

**B**

OT II assay CD8 $\alpha$ -DCs

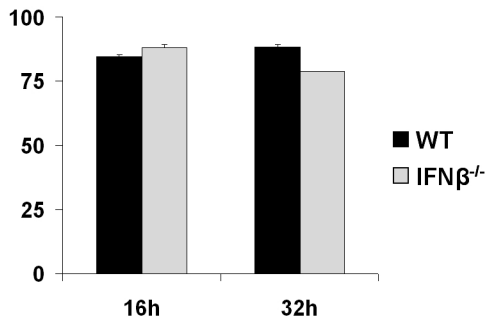

CD8 $\alpha$ +DCs

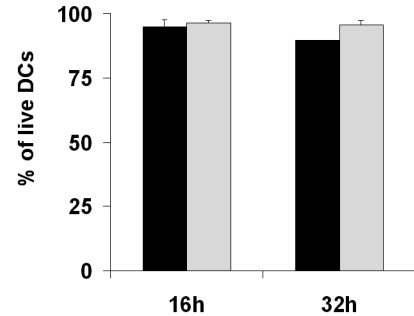

CD8 $\alpha$ +DCs

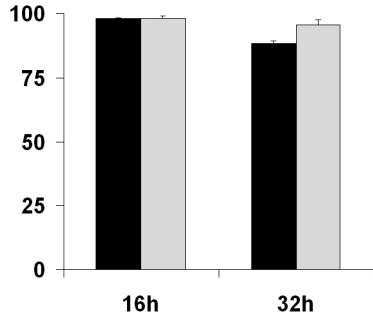

Supplement: NIHMS119797-supplement-Figure_S2.pdf [file NIHMS119797-supplement-Figure_S2.pdf]

# Figure S3

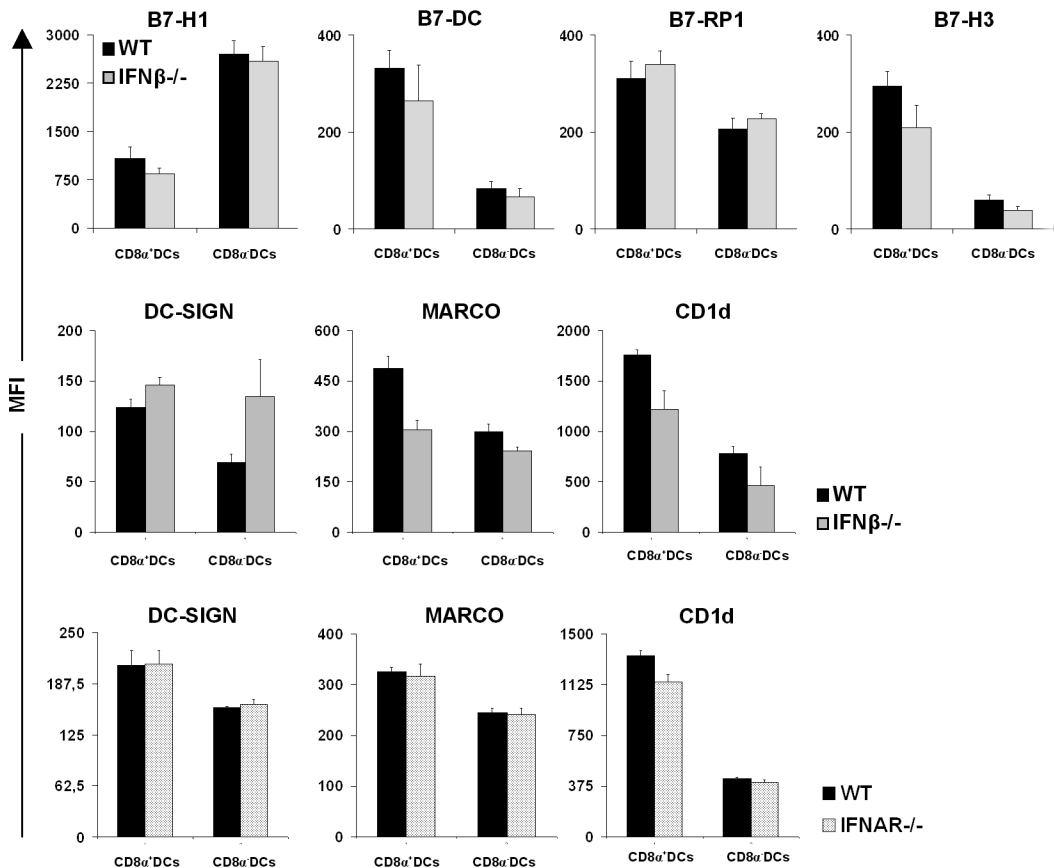

Supplement: NIHMS119797-supplement-Figure_S3.pdf [file NIHMS119797-supplement-Figure_S3.pdf]

Figure S4A

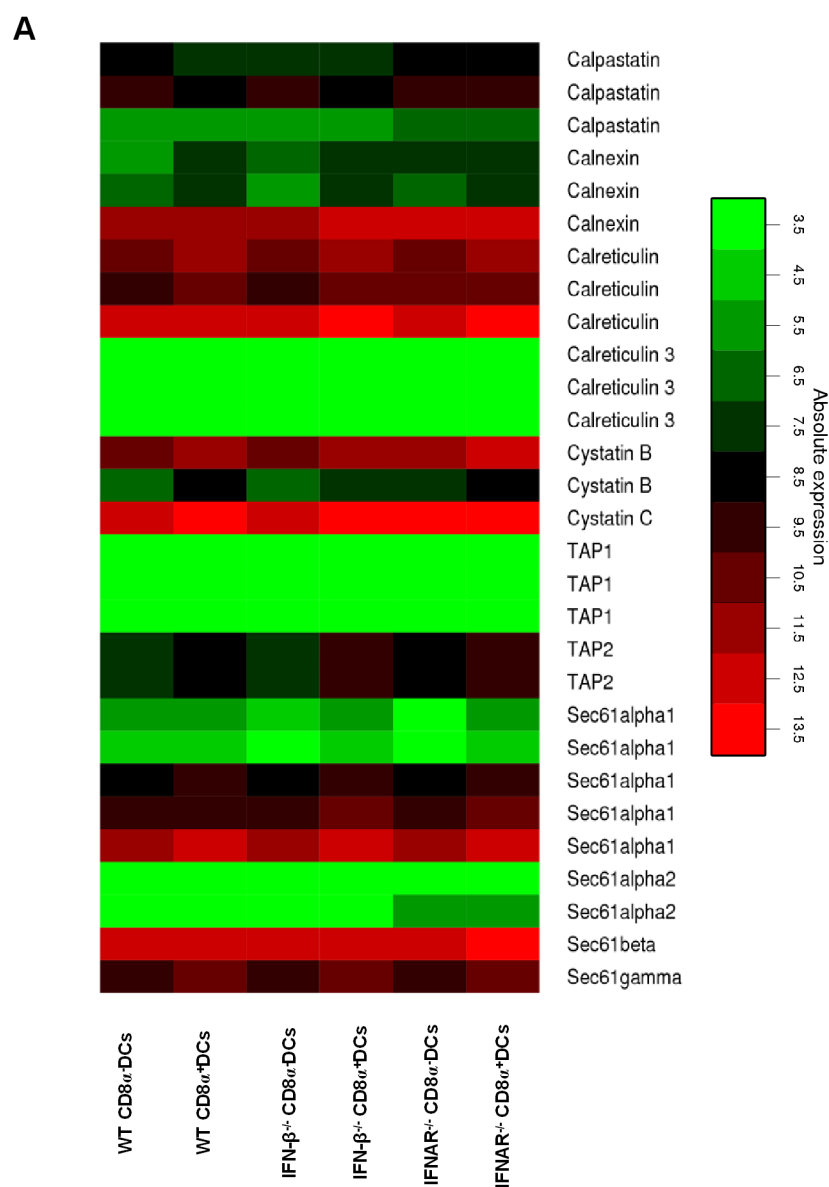

Figure S4B

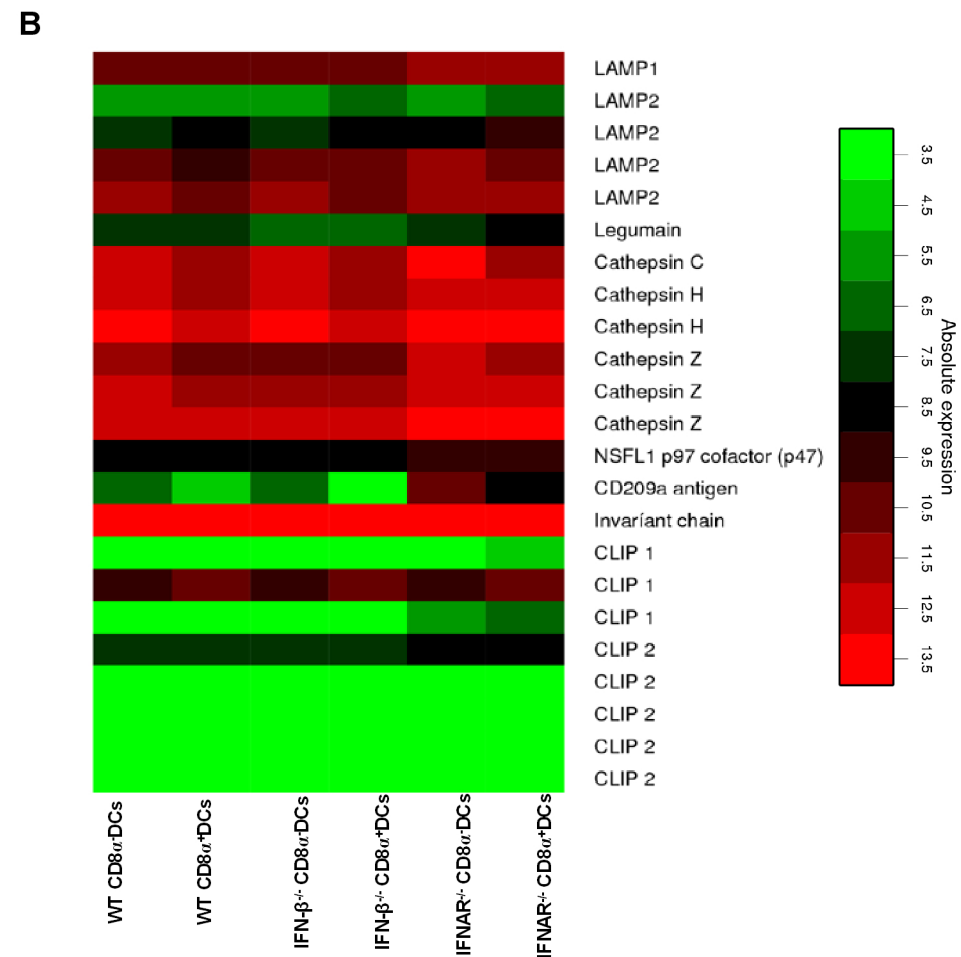

Figure S4C

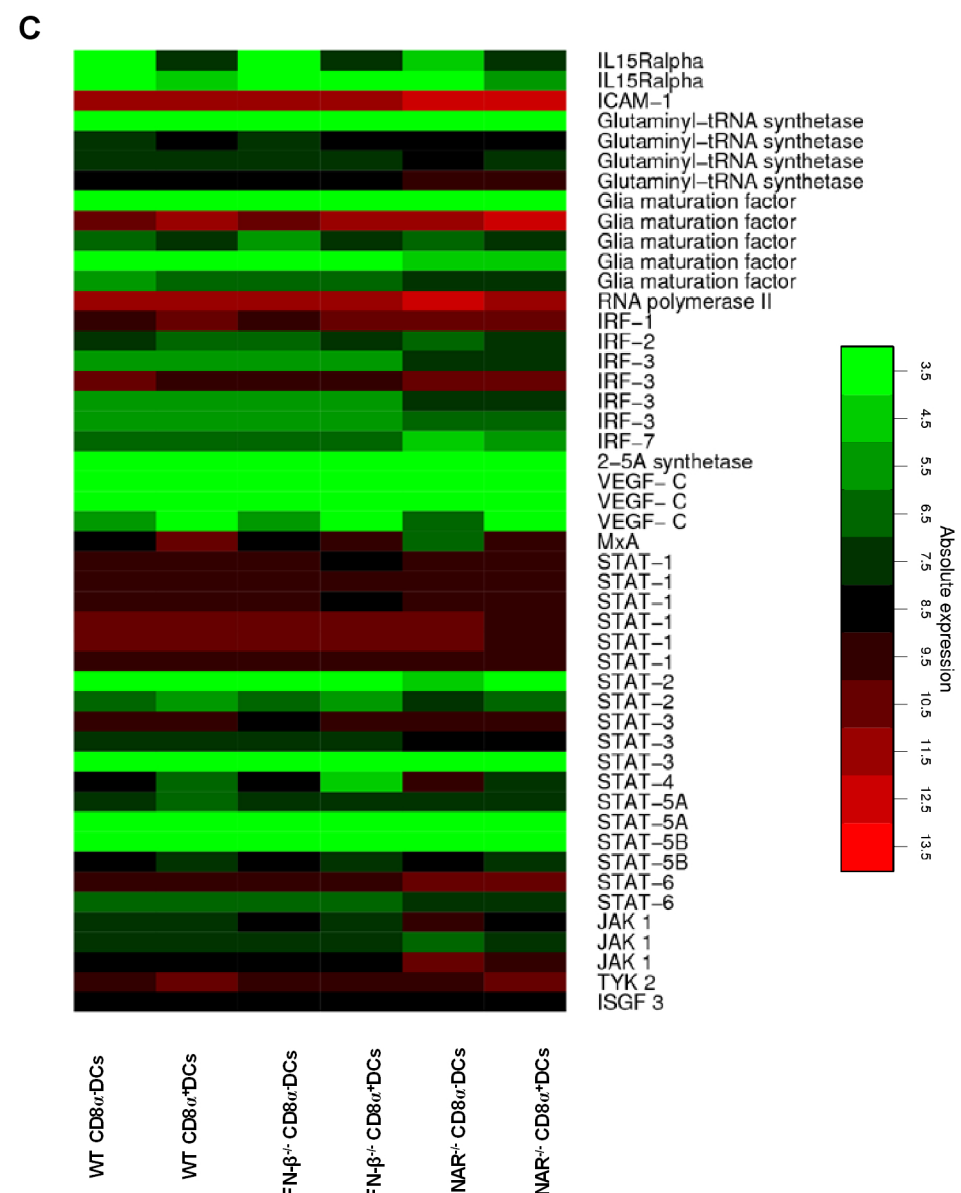

Supplement: NIHMS119797-supplement-Figure_S4.pdf [file NIHMS119797-supplement-Figure_S4.pdf]

# Figure S5

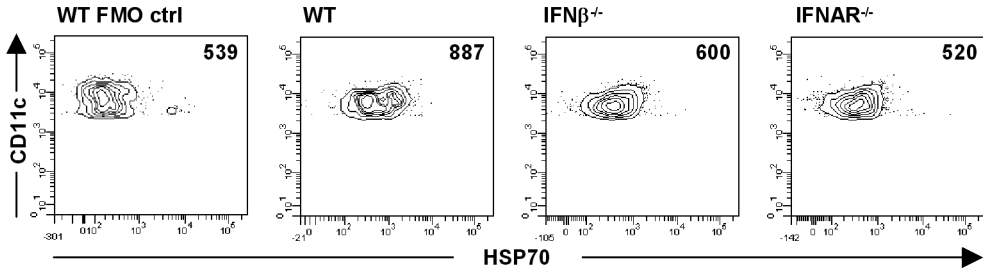

Supplement: NIHMS119797-supplement-Figure_S5.pdf [file NIHMS119797-supplement-Figure_S5.pdf]

**Figure S6**

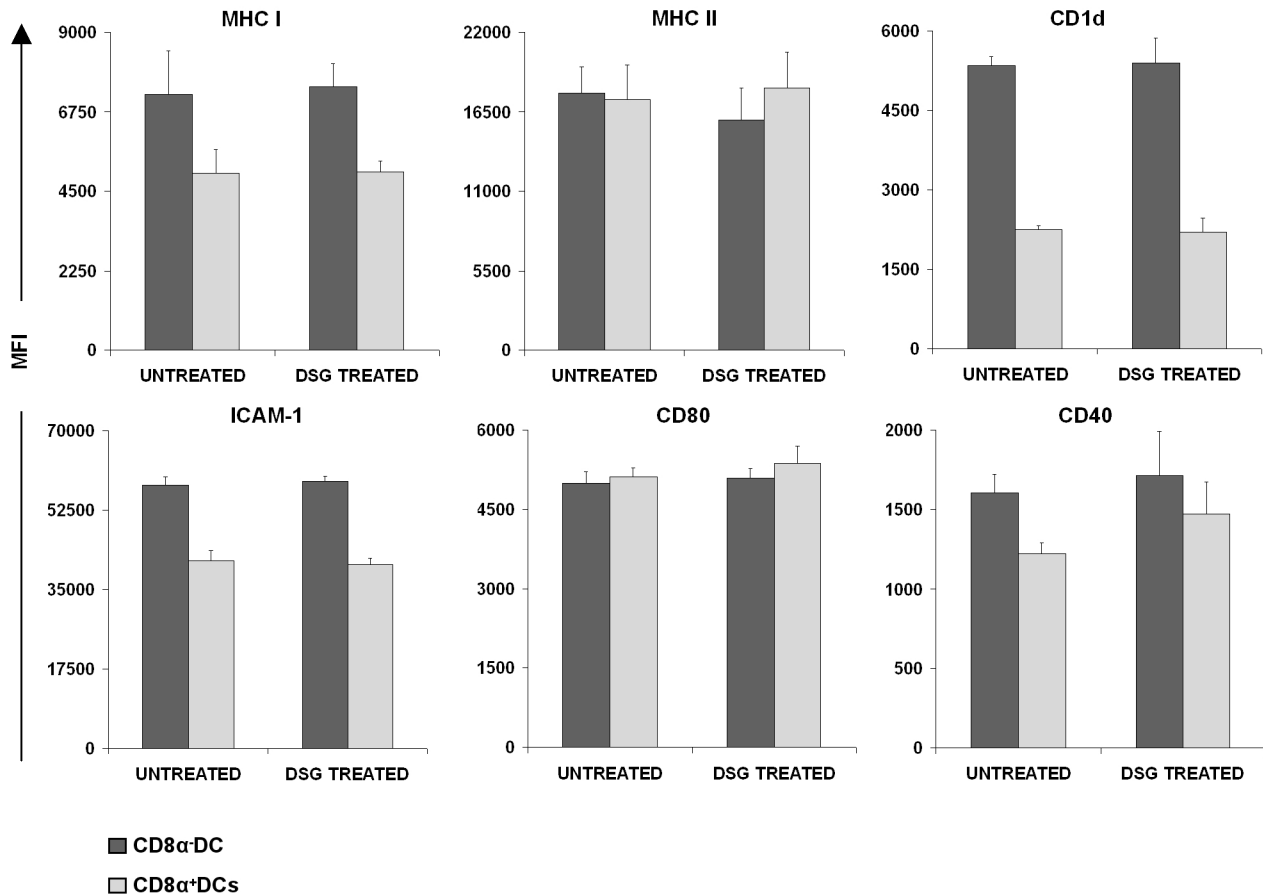

Supplement: NIHMS119797-supplement-Figure_S6.pdf [file NIHMS119797-supplement-Figure_S6.pdf]
